# Supplementary material for: Nutritional Assessment in Adult Patients with Dysphagia: A Scoping Review
Source: PubMed Central journal article supplement (PMC7997289; doi:10.3390/nu13030778), 2021-02-27
Supplement: nutrients-13-00778-s001.pdf [file nutrients-13-00778-s001.pdf]

**Supplementary Materials Table S1. Nutritional assessment used for adult patients with dysphagia.**

| Broad category | Subcategory | number of articles | Assessor               | Age, years (range)*            | Disease                                                                                                                                                                                                                                                                                                                                                                          | Author, Year, Country          |
|----------------|-------------|--------------------|------------------------|--------------------------------|----------------------------------------------------------------------------------------------------------------------------------------------------------------------------------------------------------------------------------------------------------------------------------------------------------------------------------------------------------------------------------|--------------------------------|
| BMI            | BMI         | 9                  | none                   | 61.3 (IQR: 58.4–64.2)          | Parkinson’s Disease, Alzheimer’s Disease, Amyotrophic Lateral Sclerosis, Stroke, Machado-Joseph Disease, Meige Syndrome Rubinstein–Taybi Syndrome, Traumatic brain injury, Injury by Firearm, Cervical Trauma, head and neck cancer, systemic arterial hypertension, pneumonia, diabetes mellitus, dyslipidemia, cardiovascular disease and chronicobstructive pulmonary disease | da Silva AF, 2020, Brazil [35] |
|                |             |                    | trained professionals  | 60.1±15.3                      | Parkinson’s, Alzheimer’s, Huntington’s, Amyotrophic lateral sclerosis, Machado–Joseph, progressive supranuclear palsy, Meyge’s syndrome, stroke, trigeminal neuropathy, Rubinstein-Taybi syndrome, myelitis, firearm injury, cervical trauma, presbyphagia, diabetes mellitus, hypertension, dyslipidemia and cardiovascular disease                                             | Barni GC, 2020, Brazil [41]    |
|                |             |                    | multidisciplinary team | COI: 72.9±11.4, ICOI: 78.9±8.3 | stroke                                                                                                                                                                                                                                                                                                                                                                           | Ikenaga Y, 2017, Japan [36]    |
|                |             |                    | none                   | 84.3±7.5                       | none                                                                                                                                                                                                                                                                                                                                                                             | Maeda K, 2017, Japan [42]      |
|                |             |                    | none                   | 76.6±10.5                      | none                                                                                                                                                                                                                                                                                                                                                                             | Toh Yoon EW, 2016, Japan [43]  |
|                |             |                    | none                   | 72.1±11.0                      | Subacute Stroke                                                                                                                                                                                                                                                                                                                                                                  | Nakadate A, 2016, Japan [44]   |
|                |             |                    | multidisciplinary      | Group1: 82, Group2: 80,        | none                                                                                                                                                                                                                                                                                                                                                                             | Ortega O, 2015, Spain [45]     |

|                             |                     |   |                        |                                                   |                           |                                |
|-----------------------------|---------------------|---|------------------------|---------------------------------------------------|---------------------------|--------------------------------|
|                             |                     |   | team                   | Group3: 81, Group4: 76                            |                           |                                |
|                             |                     |   | none                   | 68                                                | esophageal cancer         | Lecleire S,2006, France [46]   |
|                             |                     |   | none                   | range 42–79                                       | acute stroke, brain tumor | Jacobsson C, 1997, Sweden [47] |
| Nutritional screening tool  | MNA-SF              | 4 | none                   | men, 79.12±6.73<br>women, 79.88±7.82              | none                      | Nakazawa Y, 2020, Japan [48]   |
|                             |                     |   | none                   | 76.7±9.3                                          | stroke                    | Vilardell N, 2017, Spain [39]  |
|                             |                     |   | none                   | 84.3±7.5                                          | none                      | Maeda K, 2017, Japan [42]      |
|                             |                     |   | multidisciplinary team | Group1: 82, Group2: 80,<br>Group3: 81, Group4: 76 | none                      | Ortega O, 2015, Spain [45]     |
| Anthropometric measurements | Weight              | 5 | none                   | SEMS group:62.4,<br>PEG group: 58.5               | lung cancer               | Kim J, 2018, Korea [37]        |
|                             |                     |   | none                   | 59.1                                              | esophageal cancer         | Smith ZL, 2017, USA [49]       |
|                             |                     |   | none                   | 54                                                | nasopharyngeal carcinoma  | Wang YJ, 2014, China [38]      |
|                             |                     |   | none                   | 68                                                | esophageal cancer         | Lecleire S, 2006, France [46]  |
|                             |                     |   | none                   | 74.8±8.4 (53–89)                                  | stroke                    | Elmståhl S, 1999, Sweden [50]  |
|                             | TSF                 | 1 | none                   | range 42–79                                       | acute stroke, brain tumor | Jacobsson C, 1997, Sweden [47] |
|                             | MAMC                | 1 | none                   | range 42–79                                       | acute stroke, brain tumor | Jacobsson C, 1997, Sweden [47] |
| Body composition            | SMM (BIA)           | 1 | none                   | men, 79.12±6.73<br>women, 79.88±7.82              | none                      | Nakazawa Y, 2020, Japan [48]   |
|                             | Percentage body fat | 1 | none                   | 74.8±8.4 (53–89)                                  | stroke                    | Elmståhl S, 1999, Sweden [50]  |
|                             | Lean body mass      | 1 | none                   | 74.8±8.4 (53–89)                                  | stroke                    | Elmståhl S, 1999, Sweden [50]  |

|                    |                                            |      |      |                                              |                                                                                                                                                                                                                                                                                                                                      |                                                    |
|--------------------|--------------------------------------------|------|------|----------------------------------------------|--------------------------------------------------------------------------------------------------------------------------------------------------------------------------------------------------------------------------------------------------------------------------------------------------------------------------------------|----------------------------------------------------|
| Dietary assessment | Food intake level                          | 2    | none | Intervention: 70,<br>control: 71             | stroke                                                                                                                                                                                                                                                                                                                               | Bülow M, 2008, Sweden, Netherlands and France [51] |
|                    |                                            |      | none | 61 (26–81)                                   | Stroke, neoplasm, brain trauma, Encephalitis, central pontine myelinolysis                                                                                                                                                                                                                                                           | Bartolome G, 1997, Germany [52]                    |
|                    | Food Frequency Questionnaire               | 1    | none | 60.1±15.3                                    | Parkinson's, Alzheimer's, Huntington's, Amyotrophic lateral sclerosis, Machado-Joseph, progressive supranuclear palsy, Meyge's syndrome, stroke, trigeminal neuropathy, Rubinstein-Taybi syndrome, myelitis, firearm injury, cervical trauma, presbyphagia, diabetes mellitus, hypertension, dyslipidemia and cardiovascular disease | Barni GC, 2020, Brazil [41]                        |
|                    | Energy intake                              | 1    | none | 84.3±7.5                                     | none                                                                                                                                                                                                                                                                                                                                 | Maeda K, 2017, Japan [42]                          |
|                    | Period to meal resumption and dietary form | 1    | none | 72.7±8.6                                     | none                                                                                                                                                                                                                                                                                                                                 | Kishimoto N, 2016, Japan [53]                      |
| Daily food intake  | 1                                          | none | 72.9 | stroke                                       | Masiero, S, et al, 2008, Italy [40]                                                                                                                                                                                                                                                                                                  |                                                    |
| Blood biomarkers   | Albumin                                    | 9    | none | 84 (63–84)                                   | none                                                                                                                                                                                                                                                                                                                                 | Kimura Y, 2019, Japan [56]                         |
|                    |                                            |      | none | 59.1                                         | esophageal cancer                                                                                                                                                                                                                                                                                                                    | Smith ZL, 2017, USA [49]                           |
|                    |                                            |      | none | intervention: 72.5±2.5,<br>control: 76.2±2.3 | Alzheimer's Disease                                                                                                                                                                                                                                                                                                                  | Tang Y, 2017, China [54]                           |
|                    |                                            |      | none | 76.6±10.5                                    | none                                                                                                                                                                                                                                                                                                                                 | Toh Yoon EW, 2016, Japan [43]                      |
|                    |                                            |      | none | 72.1±11.0                                    | Subacute Stroke                                                                                                                                                                                                                                                                                                                      | Nakadate A, 2016, Japan [44]                       |

|                         |     |      |                                              |                                                                                               |                                                 |
|-------------------------|-----|------|----------------------------------------------|-----------------------------------------------------------------------------------------------|-------------------------------------------------|
|                         |     | none | 65.6 (15–91)                                 | Gaucher disease, Niemann-Pick disease, High cervical spinal cord injury, Oropharyngeal cancer | Miyake N, 2013, Japan [55]                      |
|                         |     | none | 68                                           | esophageal cancer                                                                             | Lecleire S, 2006, France [46]                   |
|                         |     | none | 74.8±8.4 (53–89)                             | stroke                                                                                        | Elmståhl S, 1999, Sweden [50]                   |
|                         |     | none | range 42–79                                  | acute stroke, brain tumor                                                                     | Jacobsson C, 1997, Sweden [47]                  |
| Hemoglobin              | 1   | none | intervention: 72.5±2.5,<br>control: 76.2±2.3 | Alzheimer's Disease                                                                           | Tang Y, 2017, China [54]                        |
| Total protein           | 1   | none | 65.6 (15–91)                                 | Gaucher disease, Niemann-Pick disease, High cervical spinal cord injury, Oropharyngeal cancer | Miyake N, 2013, Japan [55]                      |
| Transferrin             | 1   | none | range 42–79                                  | acute stroke, brain tumor                                                                     | Jacobsson C, 1997, Sweden [47]                  |
| Lymphocytes             | 1   | none | 84 (63–84)                                   | none                                                                                          | Kimura Y, 2019, Japan [56]                      |
| Pre-albumin             | 1   | none | range 42–79                                  | acute stroke, brain tumor                                                                     | Jacobsson C, 1997, Sweden [47]                  |
| C-reactive protein      | 1   | none | 74.8±8.4 (53–89)                             | stroke                                                                                        | Elmståhl S, 1999, Sweden [50]                   |
| Ceruloplasmin           | 1   |      |                                              |                                                                                               |                                                 |
| Transthyretin           | 1   |      |                                              |                                                                                               |                                                 |
| Retinol-binding protein | 1   |      |                                              |                                                                                               |                                                 |
| TIBC                    | 1   |      |                                              |                                                                                               |                                                 |
| Orosomuroid             | 1   |      |                                              |                                                                                               |                                                 |
| Others                  | MNA | 1    | A trained dietitian                          | intervention: 72.5±2.5,<br>control: 76.2±2.3                                                  | Alzheimer's Disease<br>Tang Y, 2017, China [54] |

O-PNI

1

none

76.6±10.5

none

Toh Yoon EW, 2016, Japan [43]

Abbreviations: BMI, body mass index; IQR, interquartile range; COI, complete oral intake; ICOI, incomplete oral intake; MNA-SF, Mini Nutritional Assessment-Short Form; TSF, triceps skinfolds thickness; USA, United State of America; PEG, percutaneous endoscopic gastrostomy; MAMC, mid-arm muscle circumference (MAMC=MUAC-  $\pi$ ×TSF); SMM, skeletal muscle mass; BIA, bioelectric impedance analysis; SEMS, self-expandable metallic stent; TIBC, total iron binding capacity; MNA, Mini Nutritional Assessment; O-PNI, Onodera's Prognostic Nutritional Index. \*: Age is the average of the participants' age without any comments.

### Supplementary Materials Table S2. Sources excluded following full-text review.

| Reasons                                                                                                           | Title                                                                                                                                                                                 | Author, Year, Country              |
|-------------------------------------------------------------------------------------------------------------------|---------------------------------------------------------------------------------------------------------------------------------------------------------------------------------------|------------------------------------|
| The diagnosis of dysphagia is made clinically using methods other than videofluoroscopy and fiberoptic endoscopy. | Long-Term Nasogastric Versus Percutaneous Endoscopic Gastrostomy Tube Feeding in Older Asians With Dysphagia: A Pragmatic Study                                                       | Jaafar MH, 2019, Malaysia [73]     |
|                                                                                                                   | Comparison of enteral nutrition with total parenteral nutrition for patients with locally advanced unresectable esophageal cancer harboring dysphagia in definitive chemoradiotherapy | Furuta M.,2019, Japan [74]         |
|                                                                                                                   | The Prevalence and Prognosis of Sarcopenic Dysphagia in Patients Who Require Dysphagia Rehabilitation                                                                                 | Wakabayashi H, 2019, Japan [75]    |
|                                                                                                                   | Effect of an oral health programme on oral health, oral intake, and nutrition in patients with stroke and dysphagia in Taiwan: A randomised controlled trial                          | Chen HJ, 2019, Taiwan [76]         |
|                                                                                                                   | Design and implementation of modified-texture diet in older adults with oropharyngeal dysphagia: a randomized controlled trial                                                        | Reyes-Torres CA, 2019, Mexico [77] |
|                                                                                                                   | Comparison of long-term outcomes between enteral nutrition via gastrostomy and total parenteral nutrition in older persons with dysphagia: A propensity-matched cohort study          | Masaki S, 2019, Japan [78]         |
|                                                                                                                   | The effects of resistance training of swallowing muscles on dysphagia in older people: a cluster, randomized, controlled trial                                                        | Wakabayashi H, 2018, Japan [79]    |

---

|                                                                                                                                                                                      |                                          |
|--------------------------------------------------------------------------------------------------------------------------------------------------------------------------------------|------------------------------------------|
| Effect of a Minimal-Massive Intervention in Hospitalized Older Patients with Oropharyngeal Dysphagia: A Proof-of-Concept Study                                                       | Martín, A, et al. 2018, Spain [80]       |
| Cognitive impairment has no impact on hospital-associated dysphagia in aspiration pneumonia patients                                                                                 | Maeda K, 2018, Japan [81]                |
| Malnutrition risk predicts recovery of full oral intake among older adult stroke patients undergoing enteral nutrition: Secondary analysis of a multicentre survey (the APPLE study) | Nishioka S, 2017, Japan [82]             |
| Nutritional status of older patients with oropharyngeal dysphagia in a chronic versus an acute clinical situation                                                                    | Carrión S,2017, Spain [57]               |
| LOW SERUM CHROMIUM IS RARE IN PATIENTS THAT UNDERWENT ENDOSCOPIC GASTROSTOMY FOR LONG TERM ENTERAL FEEDING                                                                           | Santos CA, 2017, Portugal [83]           |
| A Dedicated Nutritional Care Program (NUTRICARE) to reduce malnutrition in institutionalised dysphagic older people: A quasi-experimental study.                                     | Zanini M, 2017, Italy [84]               |
| Factors associated with the level of oral intake in hospitalized older adults with dysphagia: The importance of mental activity                                                      | Kuroda Y, 2016, Japan [85]               |
| Normalcy of food intake in patients with head and neck cancer supported by combined dietary counseling and swallowing therapy: A randomized clinical trial                           | Van Den Berg MGA, 2016, Netherlands [86] |
| Malnutrition and Clinical Outcome of 234 Head and Neck Cancer Patients who Underwent Percutaneous Endoscopic Gastrostomy                                                             | Fonseca J, 2016, Portugal [87]           |
| Effects of a feeding intervention in patients with Alzheimer's disease and dysphagia                                                                                                 | Chen LL,2016, China [88]                 |
| Clinical Variables Associated with Hydration Status in Acute Ischemic Stroke Patients with Dysphagia                                                                                 | Crary MA, 2016, USA [89]                 |
| Serum trace elements in dysphagic gastrostomy candidates before                                                                                                                      | Santos CA, 2016, Portugal [90]           |

---

---

|                                              |                                                                                                                                                                                                              |                                         |
|----------------------------------------------|--------------------------------------------------------------------------------------------------------------------------------------------------------------------------------------------------------------|-----------------------------------------|
|                                              | endoscopicgastrostomy for long term enteral feeding                                                                                                                                                          |                                         |
|                                              | Swallowing rehabilitation with nutrition therapy improves clinical outcome in patients with dysphagia at an acute care hospital                                                                              | Iwamoto M, 2014, Japan [91]             |
|                                              | Nutritional factors associated with survival following enteral tube feeding in patients with motor neuron disease                                                                                            | Rio A, 2010, United Kingdom [92]        |
|                                              | Serum trace elements in tube-fed neurological dysphagia patients correlate with nutritional indices but do not correlate with trace element intakes: Case of patients receiving enough trace elements intake | Obara H, 2008, Japan [93]               |
|                                              | The effectiveness of targeted feeding assistance to improve the nutritional intake of elderly dysphagic patients in hospital                                                                                 | Wright L, 2008, United Kingdom [94]     |
|                                              | A prospective comparison of percutaneous endoscopic gastrostomy and nasogastric tube feeding in patients with acute dysphagic stroke                                                                         | Hamidon, BB, 2006, Malaysia [95]        |
|                                              | Nutritional Status and Quality of Life in Patients with Percutaneous Endoscopic Gastrostomy (PEG) in Practice: Prospective One-Year Follow-Up                                                                | Klose J, 2003, Germany [96]             |
|                                              | Eating difficulties, need for assisted eating, nutritional status and pressure ulcers in patients admitted for stroke rehabilitation                                                                         | Westergren A, 2001, Sweden [97]         |
|                                              | Dysphagia and nutritional status in multiple sclerosis                                                                                                                                                       |                                         |
|                                              | A randomised prospective comparison of percutaneous endoscopic gastrostomy and nasogastric tube feeding after acute dysphagic stroke                                                                         | Thomas FJ, 1999, United Kingdom [98]    |
|                                              | Complications and outcome after acute stroke: Does dysphagia matter?                                                                                                                                         | Norton B, 1996, United Kingdom [99]     |
| Not all participants are dysphagic patients. | Low level of phosphate in male patients reporting swallowing disturbances in early Parkinson's disease                                                                                                       | Smithard DG, 1996, United Kingdom [100] |
|                                              | Relationship Between Body Mass Index and Rehabilitation Outcomes in Subacute                                                                                                                                 | Håglin L, 2020, Sweden [101]            |

---

|                           |                                                                                                                                                               |                                                        |
|---------------------------|---------------------------------------------------------------------------------------------------------------------------------------------------------------|--------------------------------------------------------|
|                           | Stroke with Dysphagia.                                                                                                                                        |                                                        |
|                           | Dysphagia is associated with oral, physical, cognitive and psychological frailty in Japanese community-dwelling elderly persons.                              | Morone G, 2020, Italy [102]                            |
|                           | Dysphagia is more strongly associated with increased intramuscular adipose tissue of the quadriceps than with loss of muscle mass in older inpatients         | Nishida N, 2020, Japan [103]                           |
|                           | A Significant Association of Malnutrition with Dysphagia in Acute Patients                                                                                    | Akazawa N, 2019, Japan [104]                           |
|                           | Survival in older adults with dementia and eating problems: to PEG or not to PEG?                                                                             | Saito T, 2018, Japan [105]                             |
|                           | Neck circumference is not associated with dysphagia but with undernutrition in elderly individuals requiring long-term care                                   | Ticinesi A, 2016, Italy [106]                          |
|                           | Head lifting strength is associated with dysphagia and malnutrition in frail older adults                                                                     | Wakabayashi H, 2016, Japan [107]                       |
|                           | Oral cancer malnutrition impacts weight and quality of life                                                                                                   | Wakabayashi H, 2015, Japan [108]                       |
|                           | Effect of induction chemotherapy on swallow physiology and saliva production in patients with head and neck cancer: A pilot study                             | Gellrich NC, 2015, Germany, Austria, Switzerland [109] |
|                           | Impact of early enteral nutrition on short term prognosis after acute stroke                                                                                  | Mittal BB, 2015, USA [110]                             |
|                           | Eating difficulties among patients 3months after stroke in relation to the acute phase                                                                        | Zheng T, 2015, China [111]                             |
|                           | Prospective evaluation of oro-pharyngeal dysphagia after severe traumatic brain injury.                                                                       | Medin J, 2012, Sweden [112]                            |
|                           | Evaluation of nutritional status in children with refractory epilepsy                                                                                         | Terré R, 2007, Spain [113]                             |
|                           | Pre-and postoperative nutritional evaluation in patients with chagasic megaesophagus                                                                          | Bertoli S, Italy [114]                                 |
|                           | Gastrooesophageal reflux in children with cerebral palsy.                                                                                                     | Penhavel FA, 2004, Brazil [115]                        |
| No nutritional assessment | Safety and efficacy of functional laryngectomy for end-stage dysphagia                                                                                        | Reyes A. L, 1993, United Kingdom [116]                 |
|                           | Effects of device-facilitated isometric progressive resistance oropharyngeal therapy on swallowing and health-related outcomes in older adults with dysphagia | Topf M. C, 2018, USA [117]                             |
|                           | Dysphagia assessed by the 10-item Eating Assessment Tool is associated with nutritional                                                                       | Rogus-Pulia N, 2016, USA [118]                         |



|                             |                                                                                                                                                 |                                 |
|-----------------------------|-------------------------------------------------------------------------------------------------------------------------------------------------|---------------------------------|
|                             | status and activities of daily living in elderly individuals requiring long-term care                                                           |                                 |
|                             | Efficacy of concurrent chemoradiotherapy as a palliative treatment in stage IVB esophageal cancer patients with dysphagia                       | Wakabayashi H, 2016, Japan [17] |
|                             | Using different perspectives to generate items for a new scale measuring medical outcomes of dysphagia (MOD)                                    | Ikeda E, 2011, Japan [119]      |
| Participants are not adults | Parent-reported indicators for detecting feeding and swallowing difficulties and undernutrition in preschool-aged children with cerebral palsy. | Martino R, 2009, Canada [120]   |
|                             | Diagnosis and treatment of feeding disorders in children with developmental disabilities                                                        | Benfer KA, 2017 [121]           |
|                             | Oropharyngeal dysfunction and gastroesophageal dysmotility are present in girls and women with Rett syndrome                                    | Schwarz SM, 2001 [122]          |
| Non-English language        | Factors associated with mortality in patients with dysphagia help in making dietary and nutritional choices                                     | Motil KJ, 1999 [123]            |
|                             | Percutaneous endoscopic gastrostomy in patients with ENT tumors                                                                                 | Ferrero L, 2015, Spain [124]    |
| Review articles             | Nutritional management in home care: Including eating disorder and dysphagia assessments                                                        | Motsch C, 1998, Germany [125]   |
